# Supplementary material for: Allelic expression mapping across cellular lineages to establish impact of non-coding SNPs
Source: PubMed Central journal article supplement (PMC4299376; doi:10.15252/msb.20145114), 2014-10-17

Figure S1. Rank order of associations in simulated candidate loci.

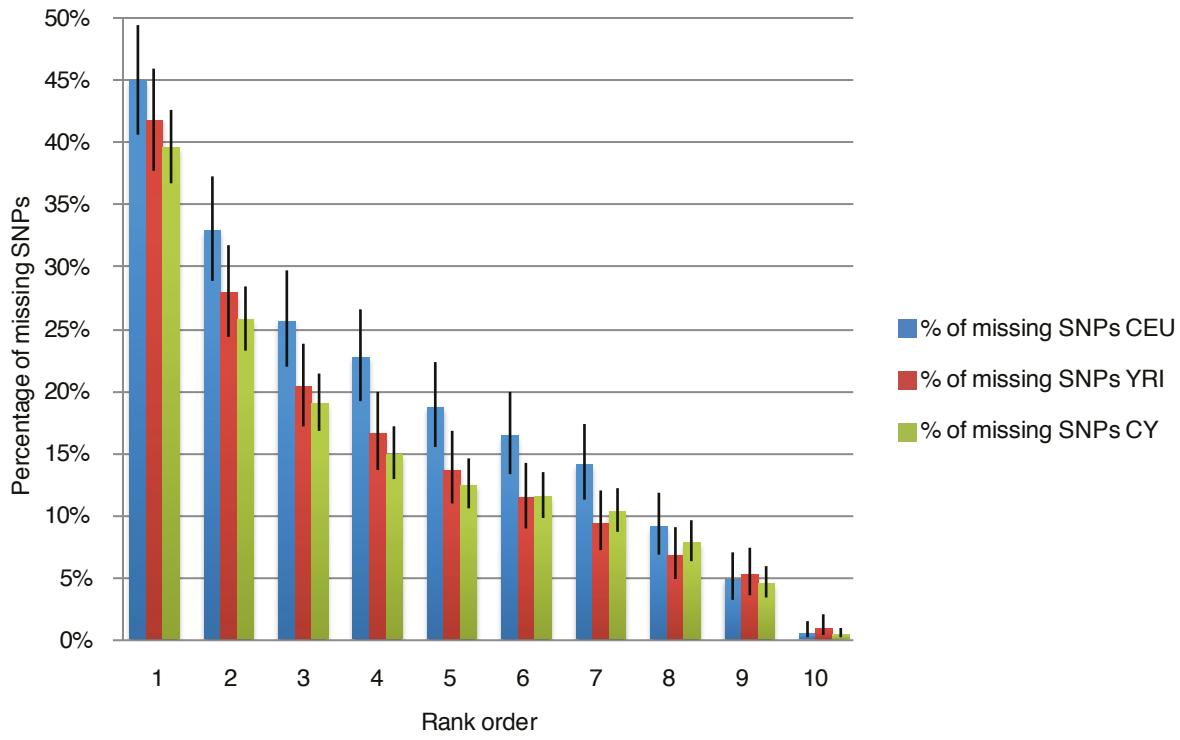

Supplement: msb0010-0754-sd1.pdf [file msb0010-0754-sd1.pdf]
