# Supplementary material for: Allelic expression mapping across cellular lineages to establish impact of non-coding SNPs
Source: PubMed Central journal article supplement (PMC4299376; doi:10.15252/msb.20145114), 2014-10-17

**Figure S2. Analysis of allelically regulated loci with shared cis-associations between populations revealed enriched networks.**

Analysis generated through the use of IPA (Ingenuity® Systems, [www.ingenuity.com](http://www.ingenuity.com)).

CY=CEU LCLs and YRI LCLs shared associations.

CYM= CY and monocytes shared associations.

CYFM= shared associations between all cell -populations (CEU LCLs, YRI LCLs, fibroblasts and monocytes).

Score is based on algorithm that aggregates genes based on known relationships in the Ingenuity Knowledge Base.

Focus molecules = # of genes in dataset involved in this network

**CY loci enriched networks (IPA analysis)**

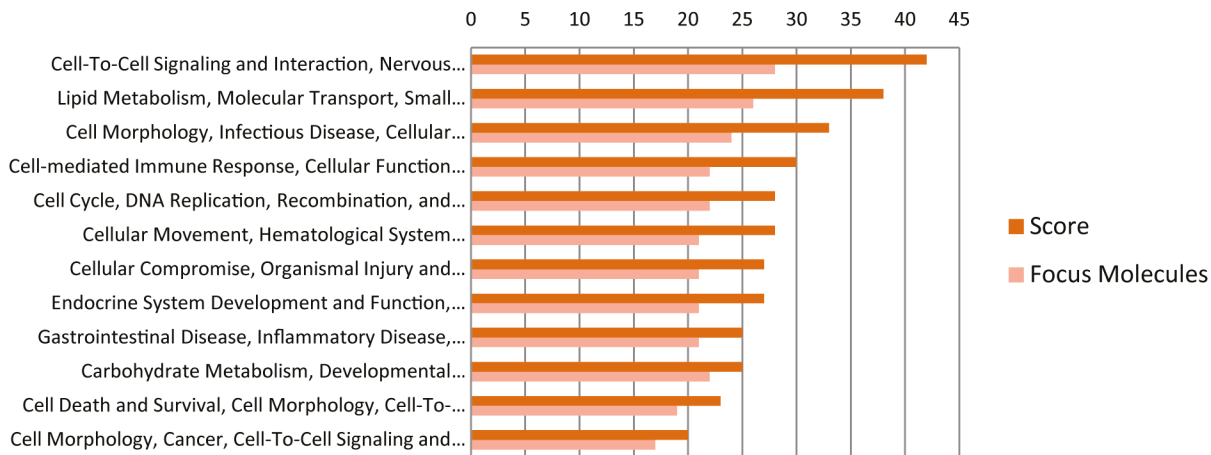

**CYM shared loci networks (IPA analysis)**

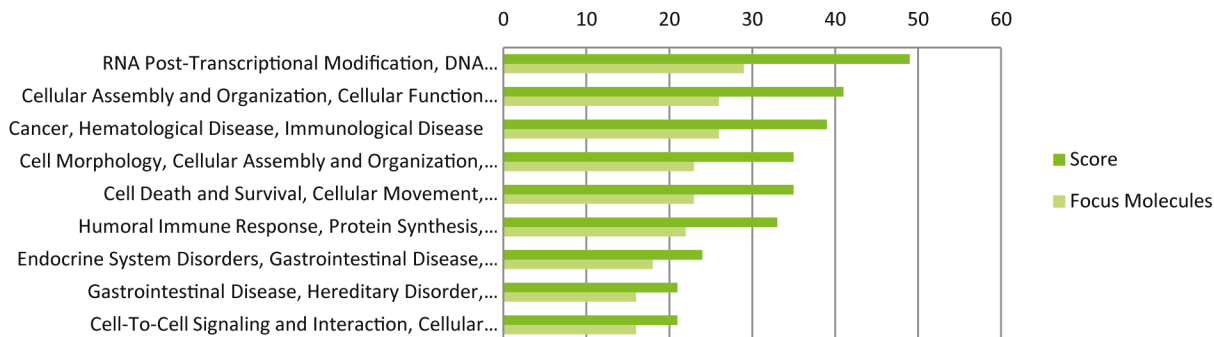

**CYFM loci networks (IPA analysis)**

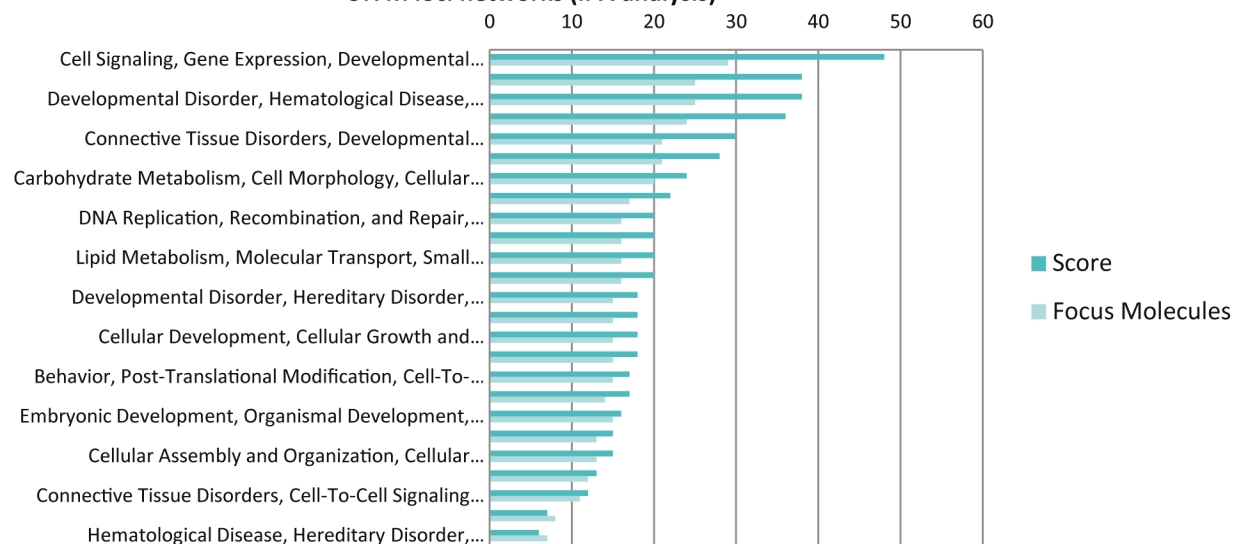

Supplement: msb0010-0754-sd2.pdf [file msb0010-0754-sd2.pdf]
