# Supplementary material for: Allelic expression mapping across cellular lineages to establish impact of non-coding SNPs
Source: PubMed Central journal article supplement (PMC4299376; doi:10.15252/msb.20145114), 2014-10-17

**Figure S4. Significant diminution of the total number of associated SNP per loci, example for loci with cis-rSNP shared between all populations ( $P < 2.08 \times 10^{-32}$ ).**

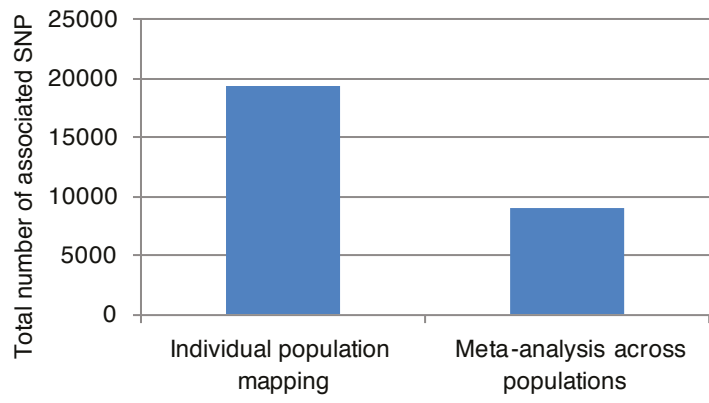

Supplement: msb0010-0754-sd4.pdf [file msb0010-0754-sd4.pdf]
