# Supplementary material for: Allelic expression mapping across cellular lineages to establish impact of non-coding SNPs
Source: PubMed Central journal article supplement (PMC4299376; doi:10.15252/msb.20145114), 2014-10-17
Supplement: msb0010-0754-sd7.pdf [file msb0010-0754-sd7.pdf]

**Figure S7. The master regulator rs3812560 is associated to differential AE of at least 5 genes and link to 4 auto-immune diseases.**

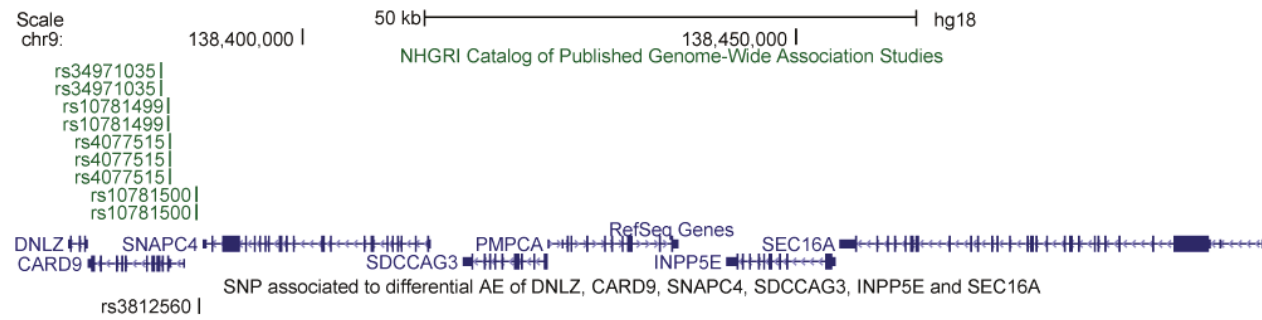

| Gene    | Acc               | Orientation | Chr | Start    | End      | Population | Genotype associated to higher gene expression | P        | Slope  |
|---------|-------------------|-------------|-----|----------|----------|------------|-----------------------------------------------|----------|--------|
| DNLZ    | ENST00000371738.3 | -           | 9   | 1.39E+08 | 1.39E+08 | M          | C                                             | 8.76E-15 | 0.036  |
| CARD9   | ENST00000371734.3 | -           | 9   | 1.39E+08 | 1.39E+08 | M          | C                                             | 2.14E-22 | 0.027  |
| SNAPC4  | ENST00000298532.2 | -           | 9   | 1.39E+08 | 1.39E+08 | CYFM       | T                                             | 2.97E-19 | -0.02  |
| SDCCAG3 | ENST00000371725.3 | -           | 9   | 1.39E+08 | 1.39E+08 | YF         | T                                             | 7.52E-09 | -0.021 |
| INPP5E  | ENST00000371712.3 | -           | 9   | 1.39E+08 | 1.39E+08 | FM         | T                                             | 5.59E-33 | -0.073 |

Variant rs3812560 (RegDG score=1f) is associated to differential allelic-expression of at least five genes: DNLZ, CARD9, SNAPC4, SDCCAG3 and INPP5E (last both not initially included in our analysis due to overlapping with other transcripts). It was mapped in different populations according to each transcript. The regulatory effect is opposite between the upstream genes (DNLZ and CARD9) and the downstream genes (SNAPC4, SDCCAG3 and INPP5E) relative to rs3812560 location. This variant is in strong LD with: rs10781499 (RegDB=NA) which is linked to ulcerative colitis risk and inflammatory bowel disease; rs10781500 (RegDB=6) a variant associated to ankylosing spondylitis and ulcerative colitis; and rs4077515 (RegDB=1f) a SNP linked to Crohn's disease susceptibility. Mainly because of its position and function, CARD9 was thought to be the candidate gene for these auto-immune diseases (Pointon et al. 2010). However, since SDCCAG3 may be involved in the modulation of TNF response, a strong immune component, it could also possibly be associated to these diseases. Supplementary work would be required to validate this hypothesis.
