# Supplementary material for: Allelic expression mapping across cellular lineages to establish impact of non-coding SNPs
Source: PubMed Central journal article supplement (PMC4299376; doi:10.15252/msb.20145114), 2014-10-17

**Figure S8. Validation of the inhibition of NFkB**

Significant changes upon perturbation of NFkB on known gene targets include IL-6 (P=0.00454), IL-8 (P=0.0097), IL-1a (P=0.0308), and Bcl-2 (P=0.0021). P-values were calculated using Fisher's exact test across five samples: GM12878, GM12891, GM12892, GM19240, GM19239, and GM19238.

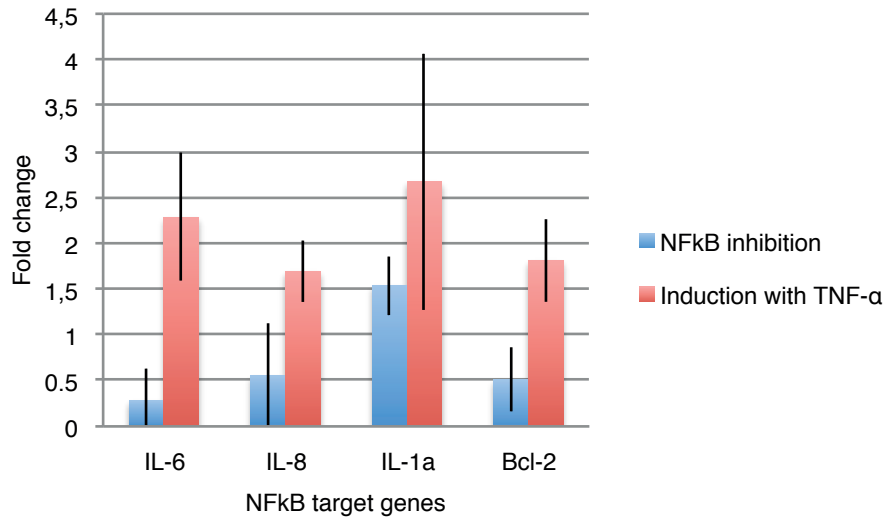

Supplement: msb0010-0754-sd8.pdf [file msb0010-0754-sd8.pdf]
