# Supplementary material for: Allelic expression mapping across cellular lineages to establish impact of non-coding SNPs
Source: PubMed Central journal article supplement (PMC4299376; doi:10.15252/msb.20145114), 2014-10-17
Supplement: msb0010-0754-sd9.pdf [file msb0010-0754-sd9.pdf]

**Figure S9. Example of disease associated SNP linked to differential AE of target gene through NFkB action.**

(A) AE linear regression graph. (B) SERPINE1 locus.

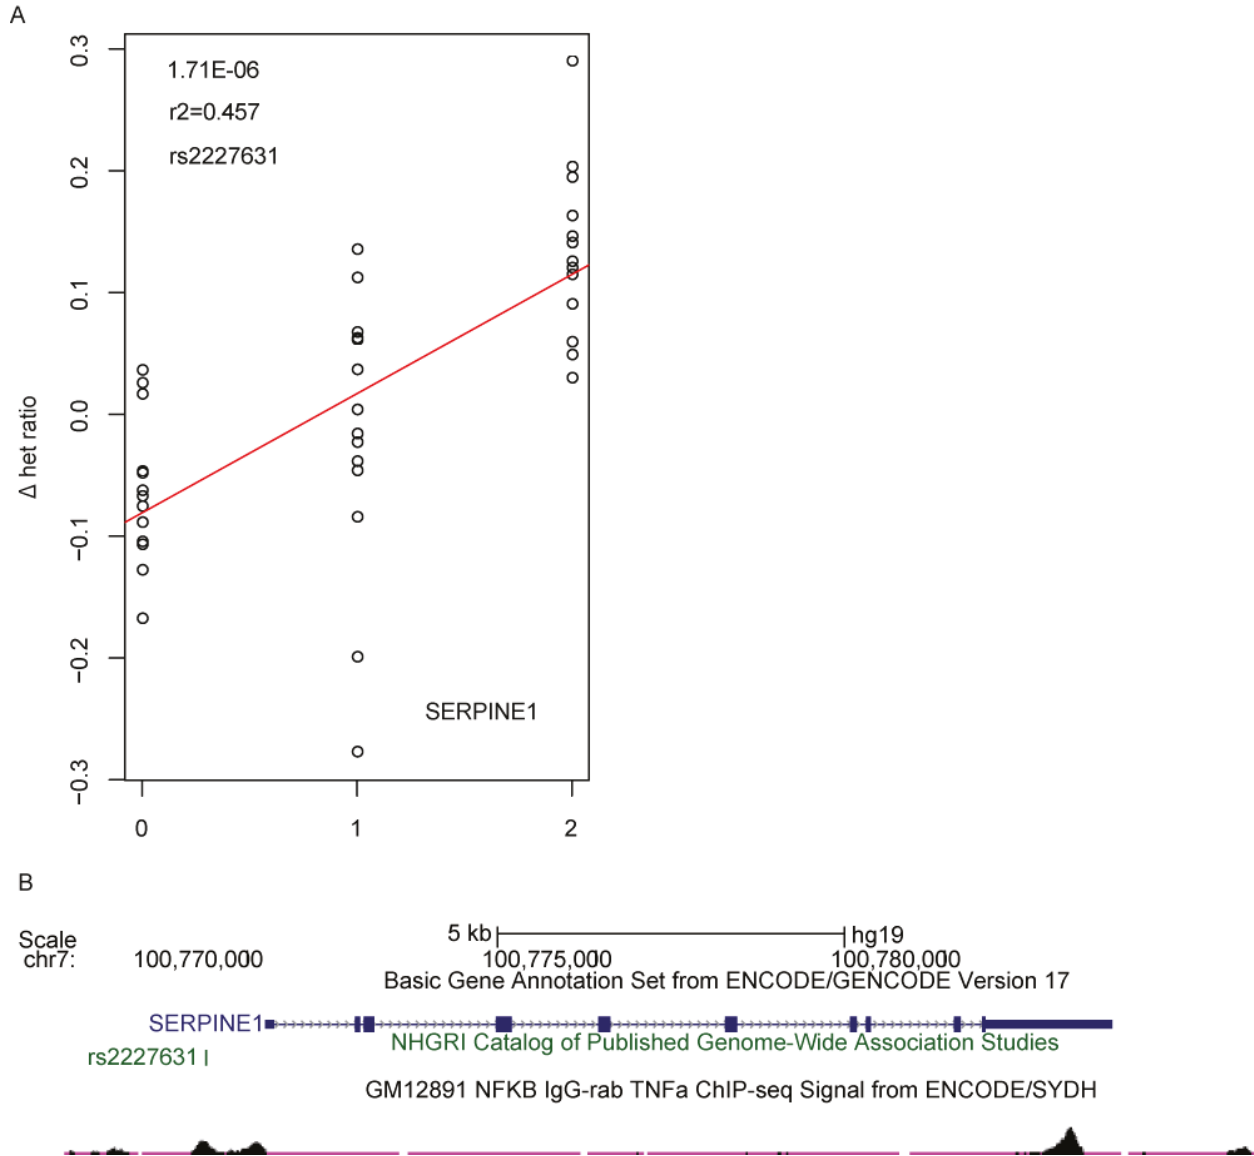

Mapped rs2227631 show strong association with differential AE of SERPINE1 ( $P=1.71 \times E-06$  in CEU population). It has been shown as linked to circulating plasminogen activator inhibitor-1 (PAI-1) concentration and sit on an NFkB ChIP-seq peak.
